# Supplementary material
Source: publisher figshare collection journal article supplement (https://acs.figshare.com/ndownloader/files/4748842)

### Text S1. Determination of Rate Law

The rate expression for the reaction of Fe(VI) with sulfonamide can be expressed as

$$-d[\text{Fe(VI)}]/dt = k[\text{Fe(VI)}]_{\text{tot}}^m [\text{S}]_{\text{tot}}^n \quad (1)$$

where  $[\text{Fe(VI)}]$  and  $[\text{S}]_{\text{t}}$  are the concentrations of Fe(VI) and sulfonamide,  $m$  and  $n$  are the orders of the reaction, and  $k$  is the overall reaction rate constant. The kinetic studies were carried out under pseudo-order conditions with sulfonamide in excess i.e.  $[\text{S}]_{\text{tot}} \gg [\text{Fe(VI)}]_{\text{tot}}$ . The Fe(VI) concentrations were ranged from  $0.50$  to  $0.75 \times 10^{-4}$  M while sulfonamide concentrations were at least ten times of Fe(VI) concentration. Equation (1) can thus be re-written under pseudo-order conditions as:

$$-d[\text{Fe(VI)}]/dt = k_1[\text{Fe(VI)}]^m \quad (2)$$

$$\text{where } k_1 = k[\text{S}]_{\text{tot}}^n \quad (3)$$

The rate law measurements were determined at pH 9.1 and 25 °C. Reactions were monitored by measuring the absorbance of Fe(VI) at 510 nm wavelength as a function of time. The reactions were followed for at least two half-lives. A successive integration model using the Global kinetic software for the absorbance of Fe(VI) as a function of time gave the best fit for an exponential value of 1, indicating the reaction is first-order with respect to Fe(VI). The  $k_1$  values for the reaction were determined at various concentrations of sulfonamide under same conditions. The  $k_1$  values were corrected for the spontaneous Fe(VI) decay in buffer solutions. The plots of  $k_1$  values versus  $[\text{S}]_{\text{tot}}$  were linear (24), which suggests that the rate law for this reaction is first-order with respect to sulfonamide.

## Text S2

The observed activation enthalpy,  $\Delta H_{\text{obs}}^{\ddagger}$ , comprises enthalpy of the reaction,  $\Delta H^{\ddagger}$ , and enthalpies of dissociations of  $\text{HFeO}_4^-$  and  $\text{SH}$ ,  $\Delta H_{\text{HFeO}_4}^{\ddagger}$  and  $\Delta H_{\text{SH}}^{\ddagger}$ , respectively. The  $\Delta H_{\text{obs}}^{\ddagger}$  in terms of individual enthalpy can be written as

$$\Delta H_{\text{obs}}^{\ddagger} = \Delta H^{\ddagger} - \Delta H_{\text{HFeO}_4}^{\ddagger} - \Delta H_{\text{SH}}^{\ddagger} \quad (\text{pH } 7.0) \quad (4)$$

The values of  $\text{pK}_{\text{a,SH}}$ , except sulfamethazine are 3-4 orders of magnitude apart from pH 9.1. It is therefore possible that the contribution of  $\Delta H_{\text{obs}}^{\ddagger}$  at pH 9.1 would be only from  $\Delta H^{\ddagger}$  and  $\Delta H_{\text{HFeO}_4}^{\ddagger}$  (eq 5).

$$\Delta H_{\text{obs}}^{\ddagger} = \Delta H^{\ddagger} - \Delta H_{\text{HFeO}_4}^{\ddagger} \quad (\text{pH } 9.1) \quad (5)$$

Thus, the differences of observed enthalpies at pH 9.1 and 7.0 give values of  $\Delta H_{\text{SH}}^{\ddagger}$  for sulfonamides except for sulfamethazine. The values of  $\Delta H_{\text{SH}}^{\ddagger}$  were determined as  $21.3 \pm 1.1$ ,  $39.4 \pm 2.4$  and  $36.9 \pm 3.0$   $\text{kJ mol}^{-1}$  for sulfoxazole, sulfamethizole, and sulfamethoxazole, respectively. The value of  $\Delta H_{\text{SH}}^{\ddagger}$  for sulfamethoxazole given in the literature (34) using solubility measurement is  $33.76 \pm 0.25$   $\text{kJ mol}^{-1}$  and is in reasonable agreement with the value obtained in our study. A similar calculation could not be performed for sulfadimethoxine because it was not possible to perform temperature dependence measurements of its rates with Fe(VI) at pH 7.0. A solution of its powder could not be dissolved at this pH because of its low solubility. The values of  $\text{pK}_{\text{SH}}$  and  $\text{pK}_{\text{HFeO}_4}$  for sulfamethazine are similar (Table 1) and the difference in  $\Delta H_{\text{obs}}^{\ddagger}$  at pH 7.0 and 9.1 is most likely related to the difference in rate constants for the reactions of Fe(VI) species with sulfamethazine species (eqs 2-4 in manuscript). The pH dependence of the rates for the reaction of sulfamethazine with Fe(VI) at different temperature is needed to unravel the difference in  $\Delta H_{\text{obs}}^{\ddagger}$  at the two pH conditions.

**Table S1. Temperature Dependence of Rate Constants ( $k$ ,  $M^{-1}s^{-1}$ ) for oxidation of Sulfonamide Antimicrobials by Fe(VI) at pH 7.0 and 9.1.**

| Compound         | pH  | 15 °C     | Temperature<br>25 °C | 35 °C      | 45 °C     |
|------------------|-----|-----------|----------------------|------------|-----------|
| Sulfisoxazole    | 7.0 | 1296±31.6 | 1504±32.0            | 1763±47.4  | 1981±37.0 |
|                  | 9.1 | 22.8±1.10 | 33.6±5.77            | 52.0±1.02  | 81.6±2.21 |
| Sulfamethazine   | 7.0 | 736±19.6  | 869±33.3             | 892±23.3   | 1143±45.8 |
|                  | 9.1 | 7.79±0.79 | 14.7±0.61            | 20.3±0.75  | 28.9±0.94 |
| Sulfamethiazole  | 7.0 | 672±10.1* | 640±24.1             | 552±13.2   | 468±13.3  |
|                  | 9.1 | 1.84±0.08 | 3.13±0.57            | 3.75±0.57  | 5.89±0.21 |
| Sulfadimethoxine | 9.1 | 4.25±0.39 | 6.12±0.41            | 8.58±0.74  | 14.01±.83 |
| Sulfamethoxazole | 7.0 | 828±65.1  | 846±38.2             | 857±38.0   | 895±41.5  |
|                  | 9.1 | 7.68±0.10 | 13.54±0.80           | 20.71±0.10 | -         |

\*20 °C

**Table S2. IR peaks of various functional groups present in SMX, A, B and C.**

|                                                       | SMX | A | B | C |
|-------------------------------------------------------|-----|---|---|---|
| CH <sub>3</sub> , (2959, 2926 cm <sup>-1</sup> )      | ✓   | ✓ | ✓ | ✓ |
| C=C-H (1600 cm <sup>-1</sup> )                        | ✓   | ✓ | ✓ | ✓ |
| N-H amide, (1528 cm <sup>-1</sup> )                   | ✓   | ✓ | ✓ | ✓ |
| SO <sub>2</sub> amide, (1348, 1398 cm <sup>-1</sup> ) | ✓   | ✓ | ✓ | ✓ |
| SO <sub>2</sub> NH, (1116 cm <sup>-1</sup> )          | ✓   | ✓ | ✓ | ✓ |
| C=N, (1644 cm <sup>-1</sup> )                         | ✓   |   |   |   |
| N-H amine, stretch, (3392 cm <sup>-1</sup> )          | ✓   | ✓ |   |   |
| N=O, (1592 cm <sup>-1</sup> )                         |     | ✓ | ✓ | ✓ |
| C=O stretch, (1720 cm <sup>-1</sup> )                 |     | ✓ | ✓ | ✓ |

**FIGURE S1.** The temperature dependence of the observed second-order rate constants for the reaction between Fe(VI) and sulfonamides at different pH. ○- sulfamethazine, □- sulfamethoxazole (data at pH 7.0 were taken from (24)), Δ- sulfadimethoxine ●- sulfamethizole, ◇-sulfisoxazole)

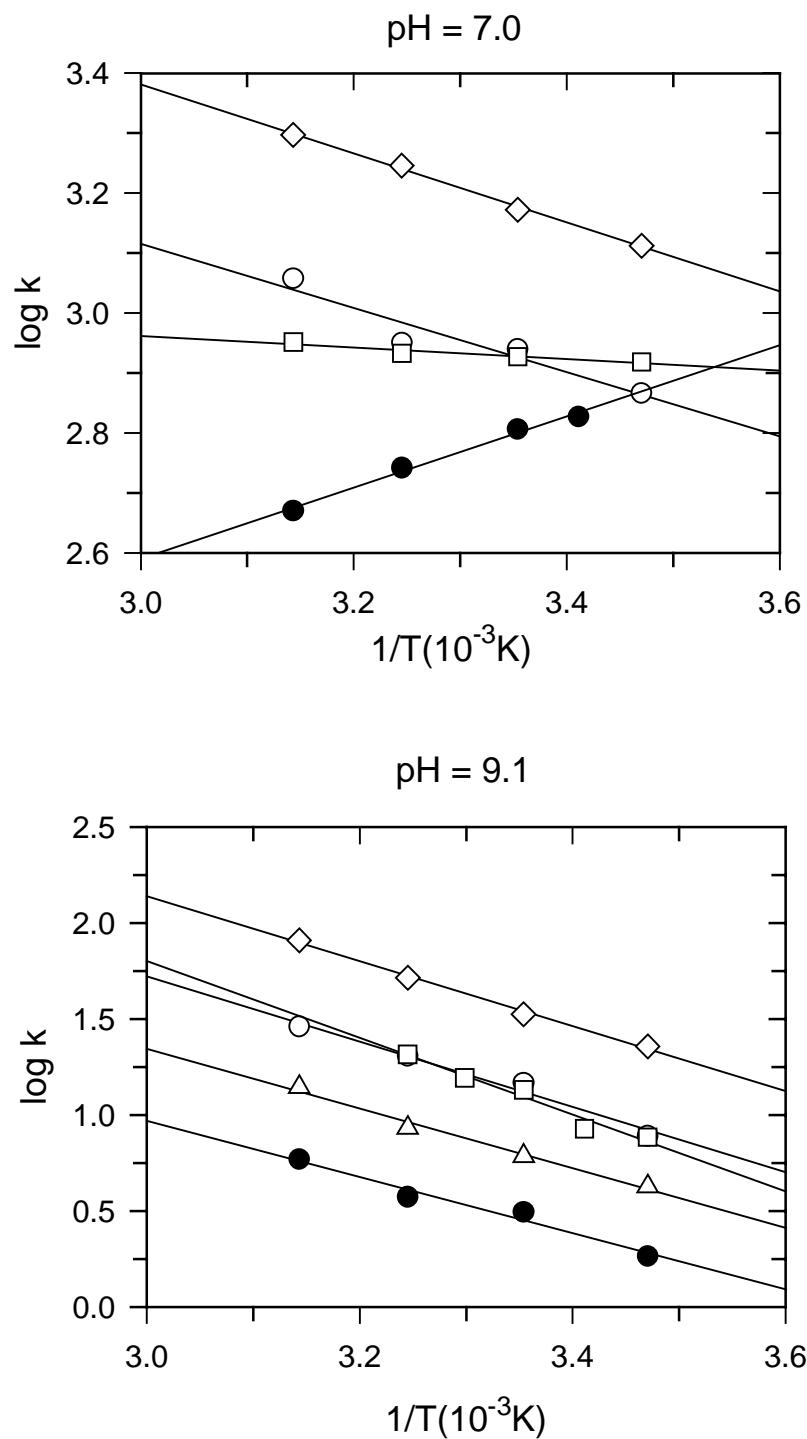

**FIGURE S2.** A plot of SMX decrease and formation of oxygen in the reaction of sulfamethoxazole with Fe(VI) under anoxic conditions (sulfamethoxazole ( $\Delta$  -pH 7.0,  $\square$  - pH 9.0),  $\bullet$ -oxygen (pH 9.0))

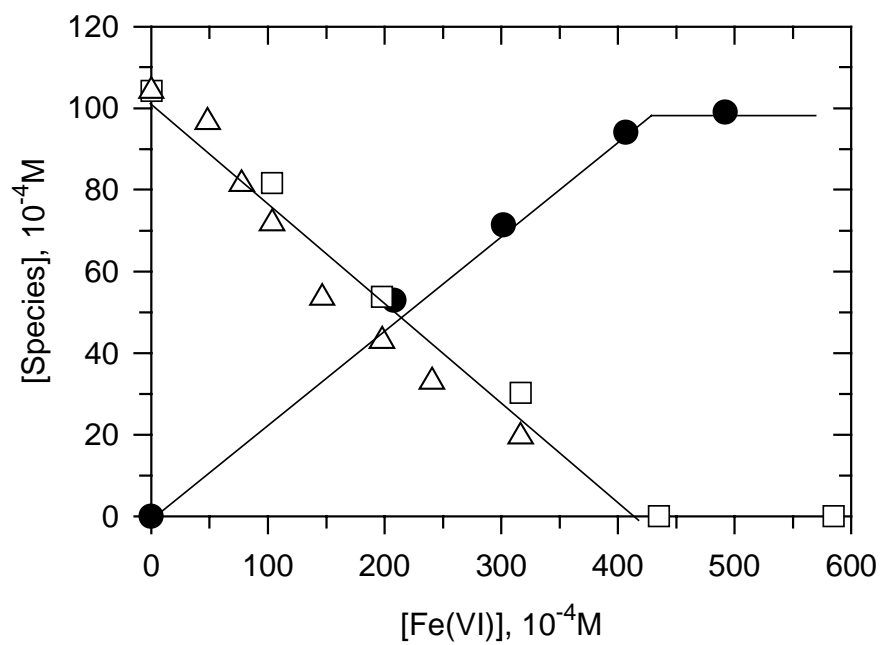

**FIGURE S3. Various sub-structural models of SMX.**

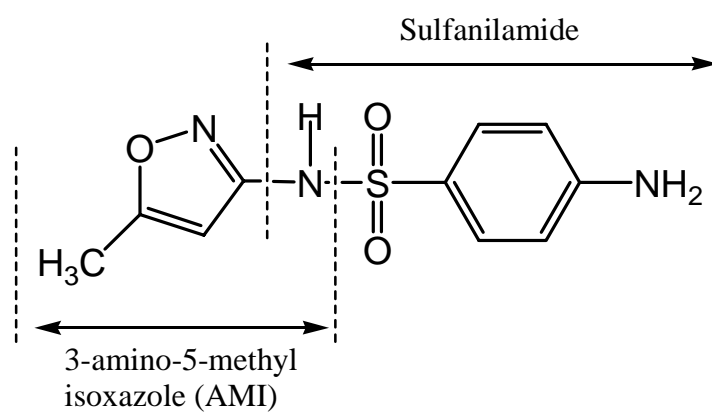

**Figure S4. Plots of pseudo-first-order,  $k_1$ ,  $s^{-1}$  versus concentrations of substructure compounds at pH 9.0 and 25 °C. A- sulfanilamide; B- 3-amino-5-methyl isoxazole (AMI) ( $[Fe(VI)] = 1.5 \times 10^{-4} M$ ).**

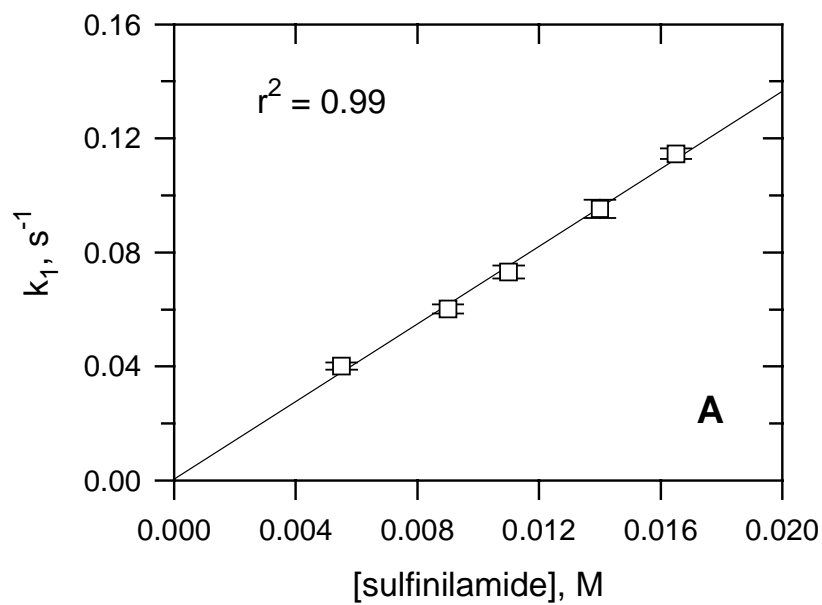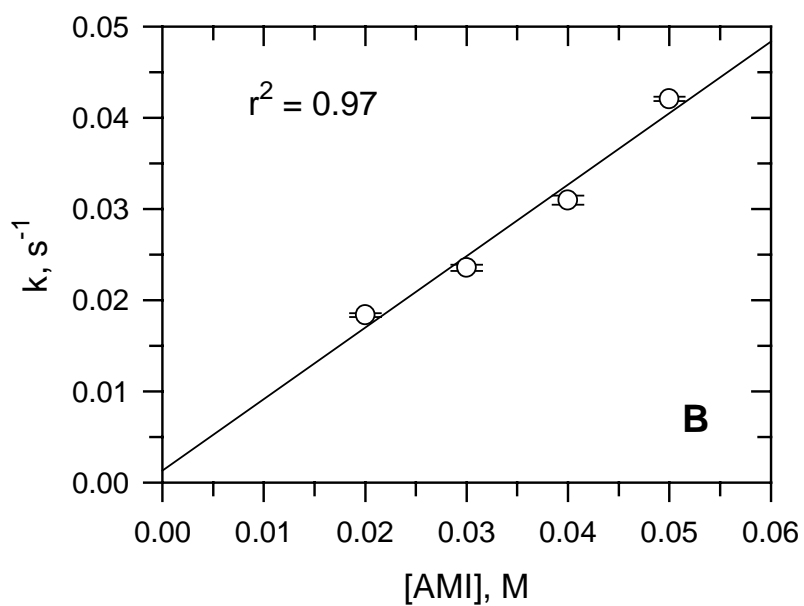

**Figure S5. Chemical shifts of the non-exchangeable protons of SMX and the products from NMR spectra taken in CD<sub>3</sub>OD.**

SMX :

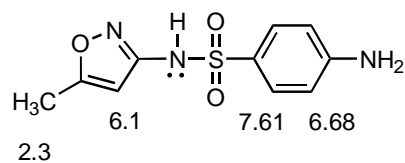

Product A:

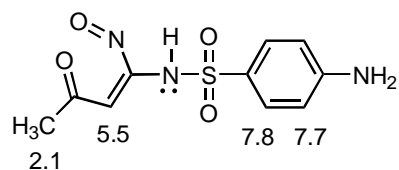

Product B:

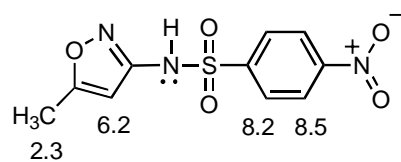

Product C:

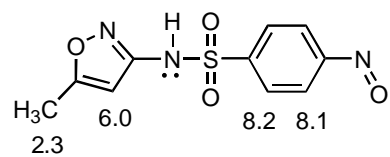

**Figure S6.** The three spectra are direct ESI measurements of (a) the SMX in aqueous solution at pH 9 (at 10  $\mu$ M), (b) the addition of 5 equivalents of Fe(VI) at pH 9 after 7 min, and (c) an injection after 58 min of reaction time. Some minimal decrease in the SMX peak is observed in (b), and a substantial decrease of the SMX peak is observed in (c) with the appearance of a peak at 292.039 depicting product A+Na. Please note that the peaks with non-zero in the first decimal place (e.g. 288.312) do not correspond to SMX or any of its products. The AccuTOF instrument was calibrated for high resolution mass, and therefore 3 in the first decimal place corresponds to other impurities that are present at low concentrations (in the range of our SMX study).

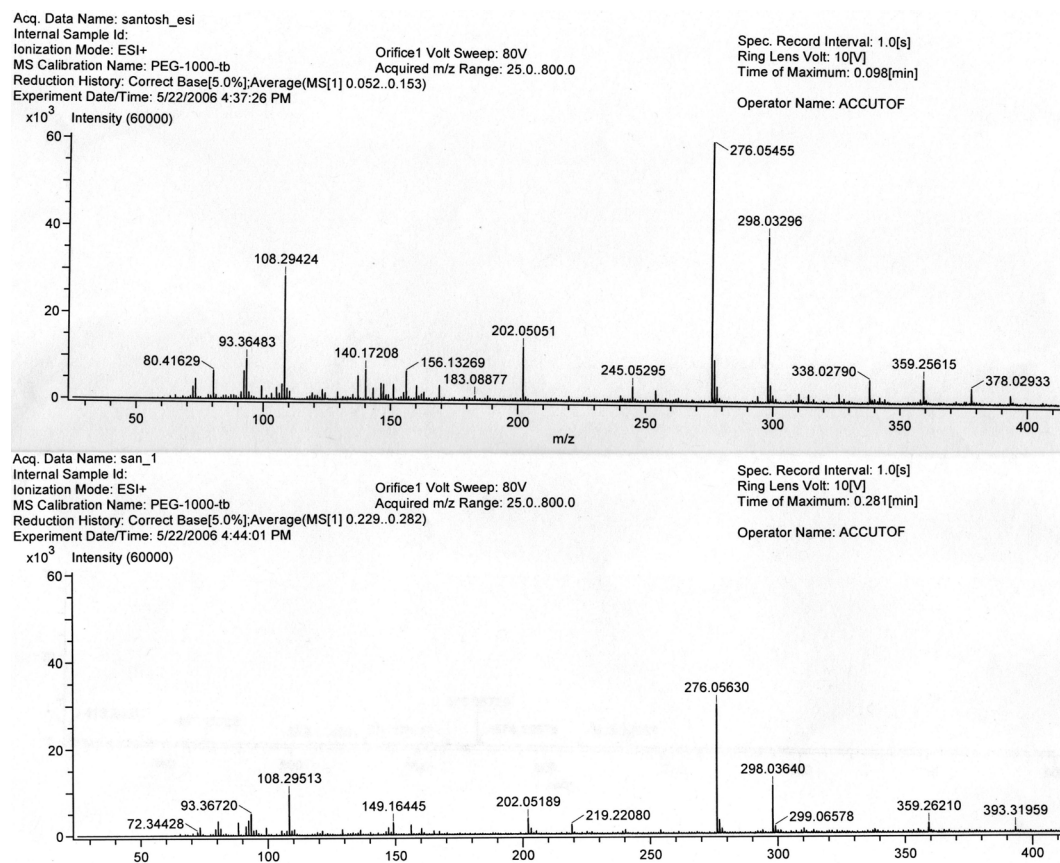

Acq. Data Name: san2b

Internal Sample Id:

Ionization Mode: ESI+

MS Calibration Name: PEG-1000-1b

Reduction History: Determine m/z[Peak Detect[Centroid,50,Area],Correct Base[],Smooth[5]],Correct Base[5.0%],Average[MS[1] 0.201..0.382]

Experiment Date/Time: 5/22/2006 5:41:25 PM

Orifice1 Volt Sweep: 80V

Acquired m/z Range: 25.0..800.0

Spec. Record Interval: 1.0[s]

Ring Lens Volt: 10[V]

Time of Maximum: 0.250[min]

Operator Name: ACCUTOF

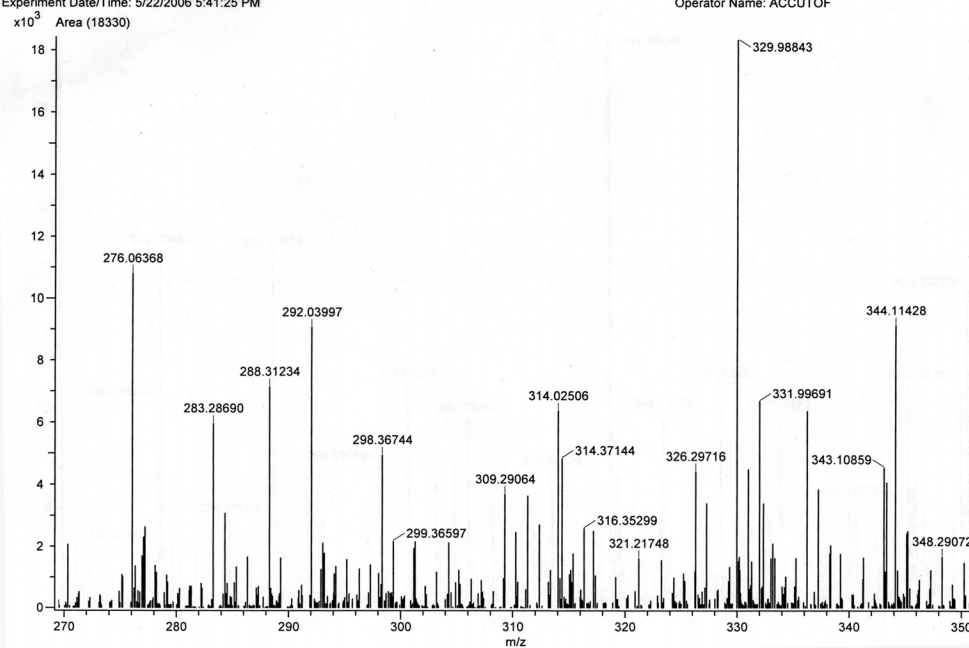

Supplement: Supplementary file 1 [file 4748842]
